# Supplementary material
Source: ML conference proceedings conference paper supplement (https://openreview.net/forum?id=5yedZXV7wt)

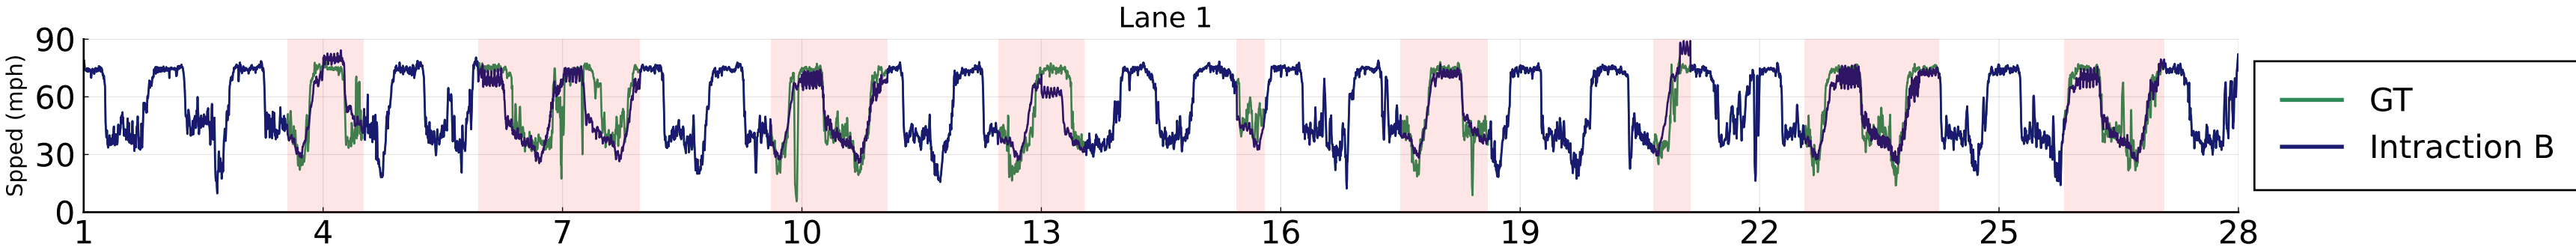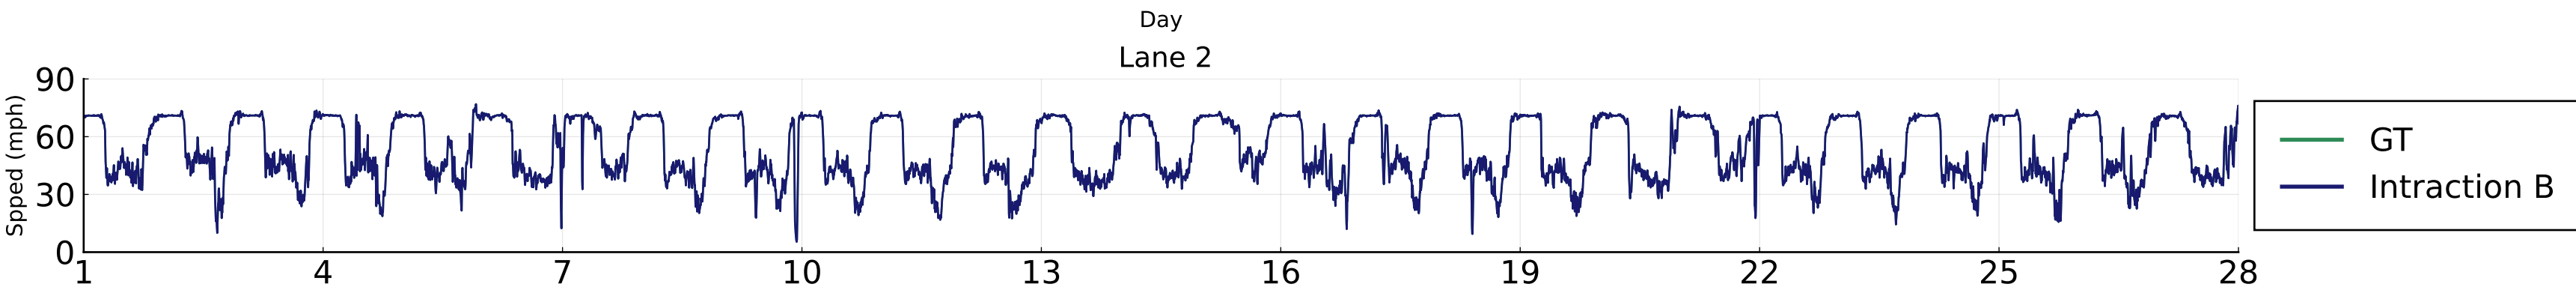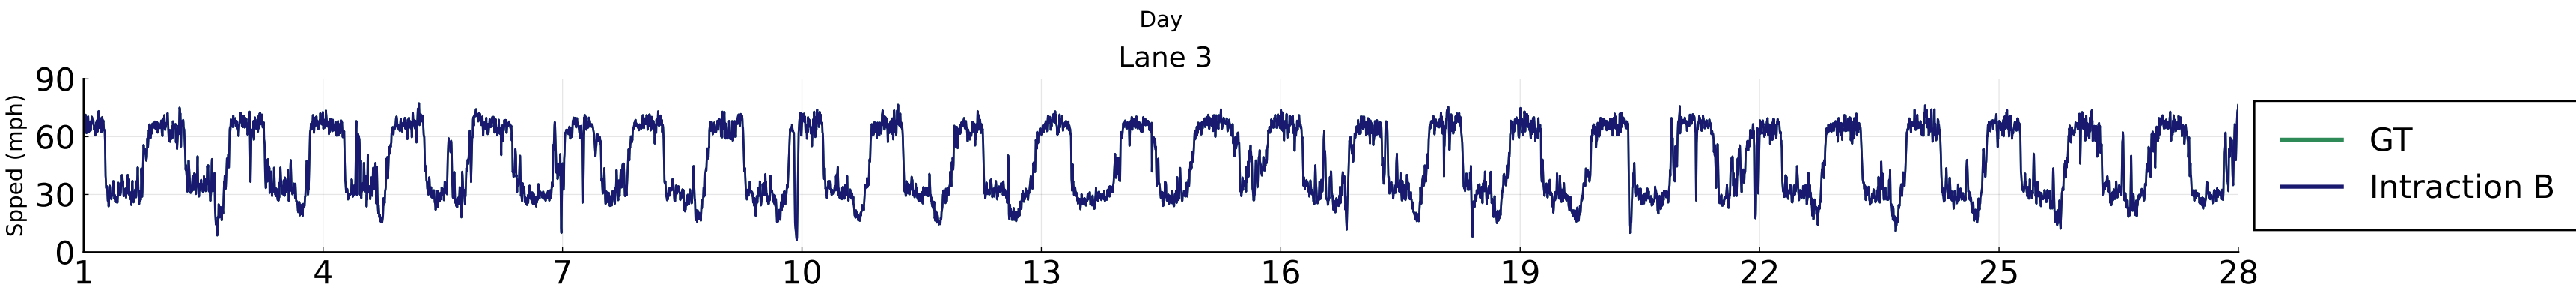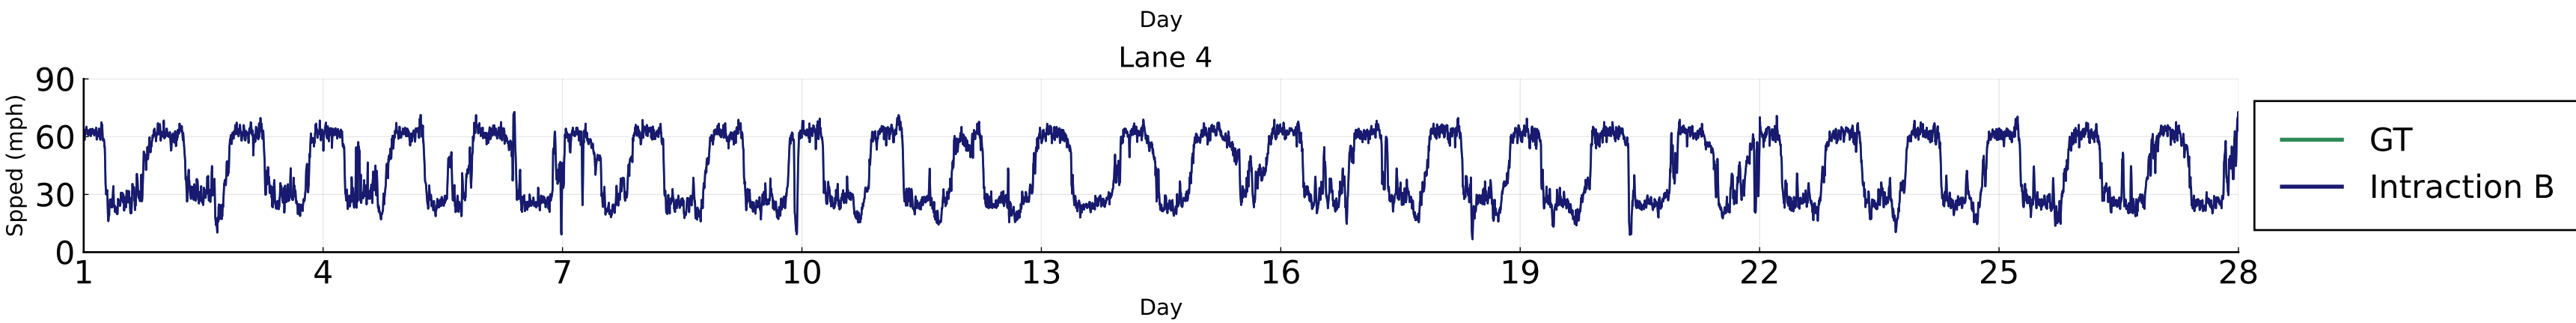

Supplement: supplementary_material [file attachment]

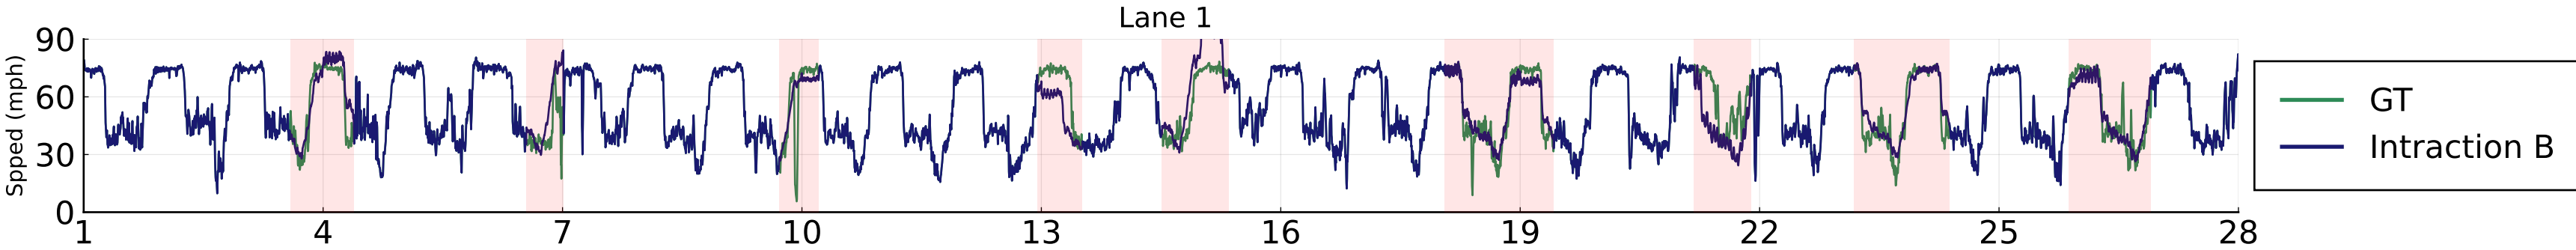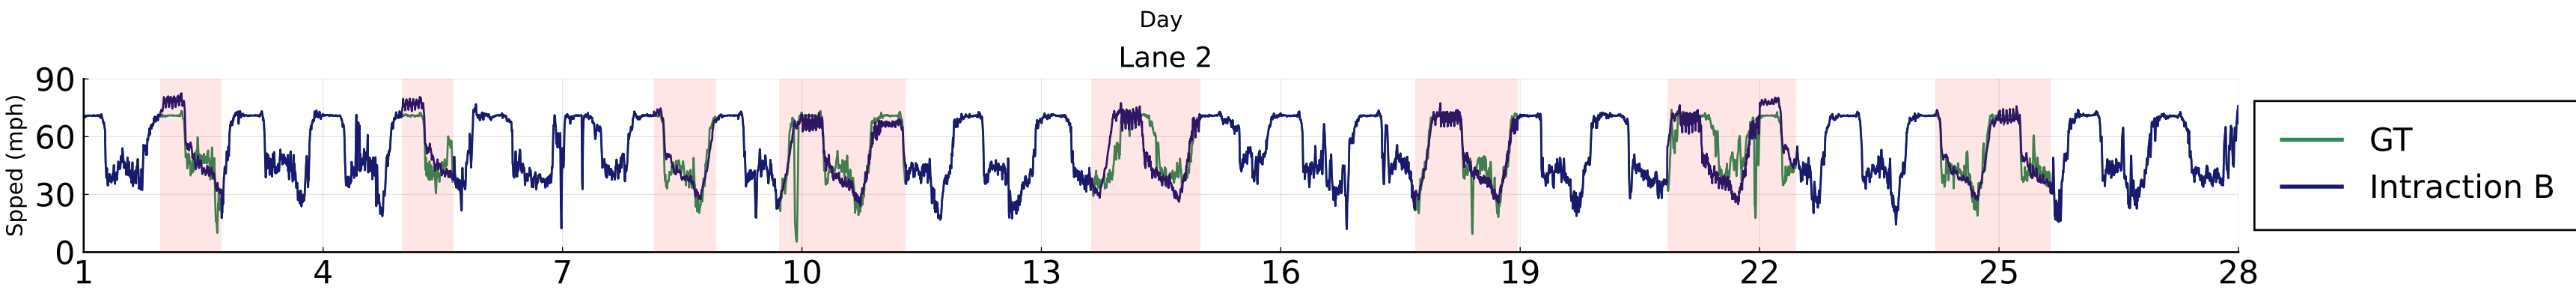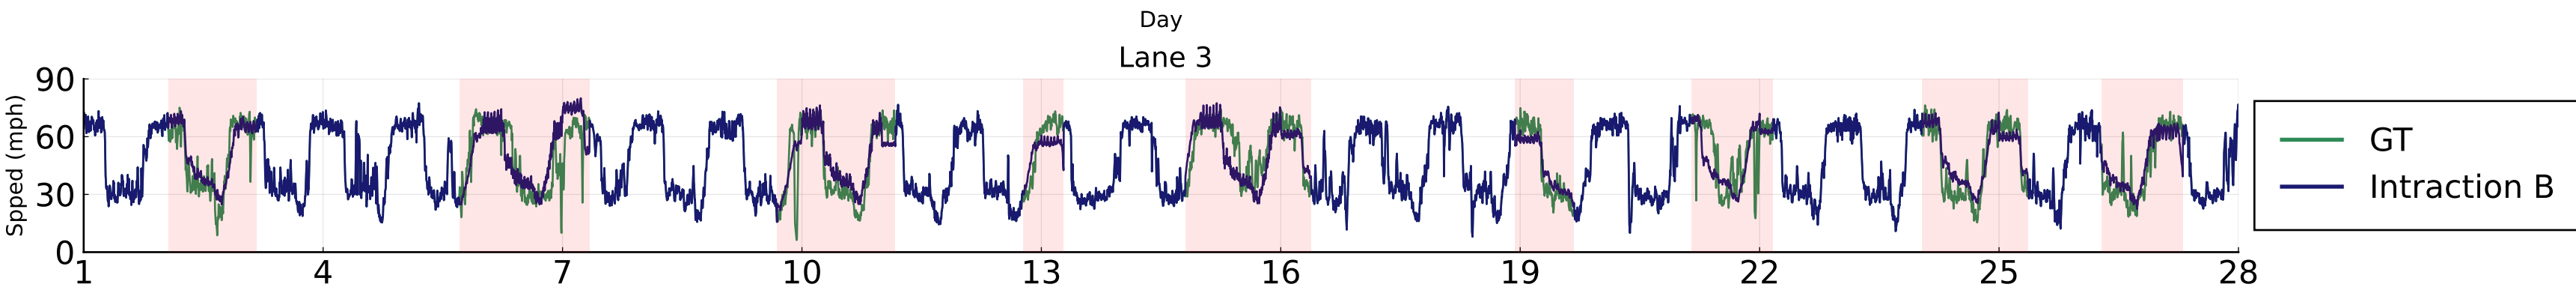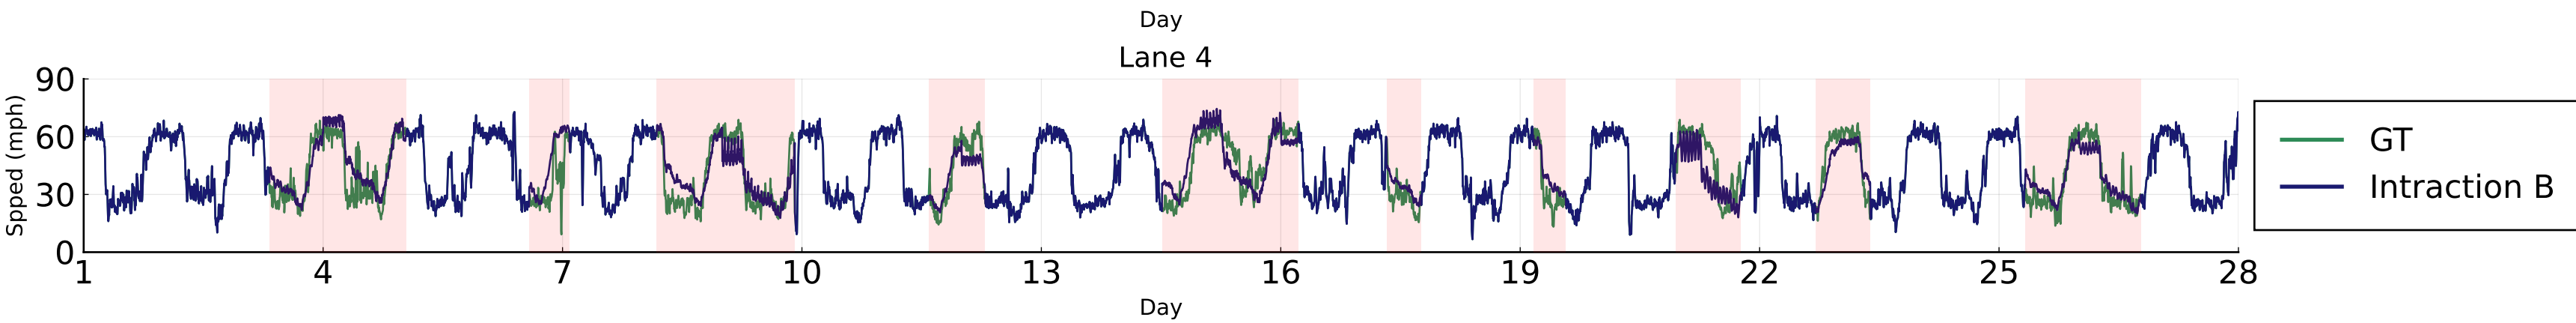

Supplement: supplementary_material [file attachment]

## Scenario 2

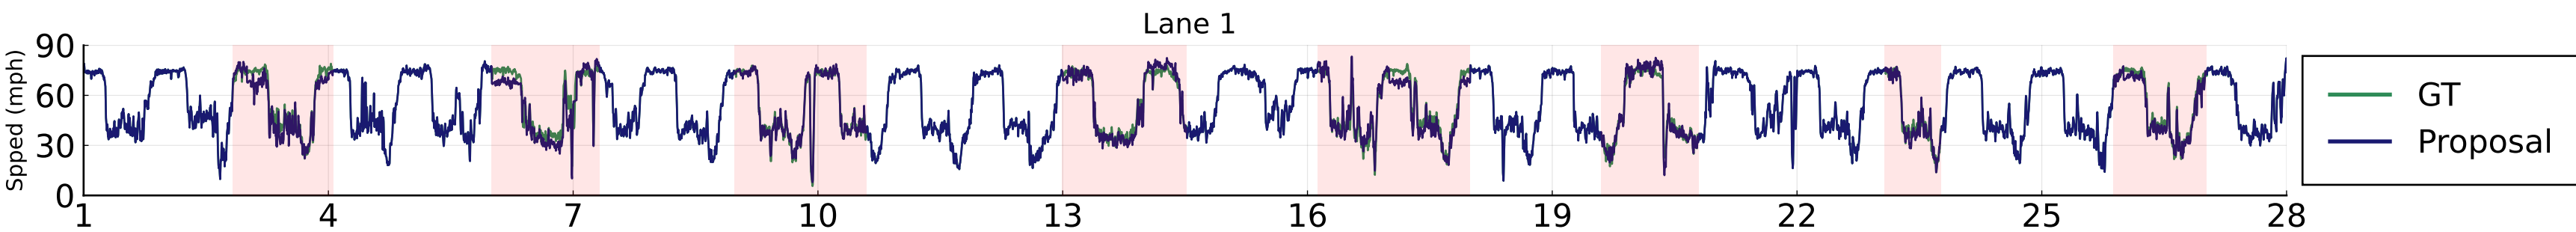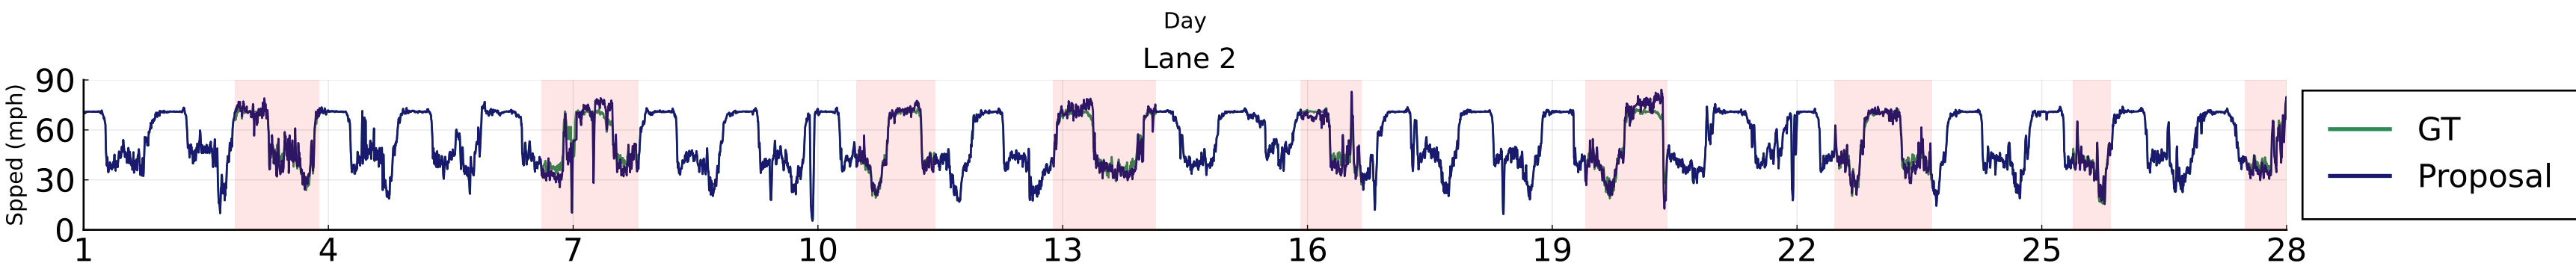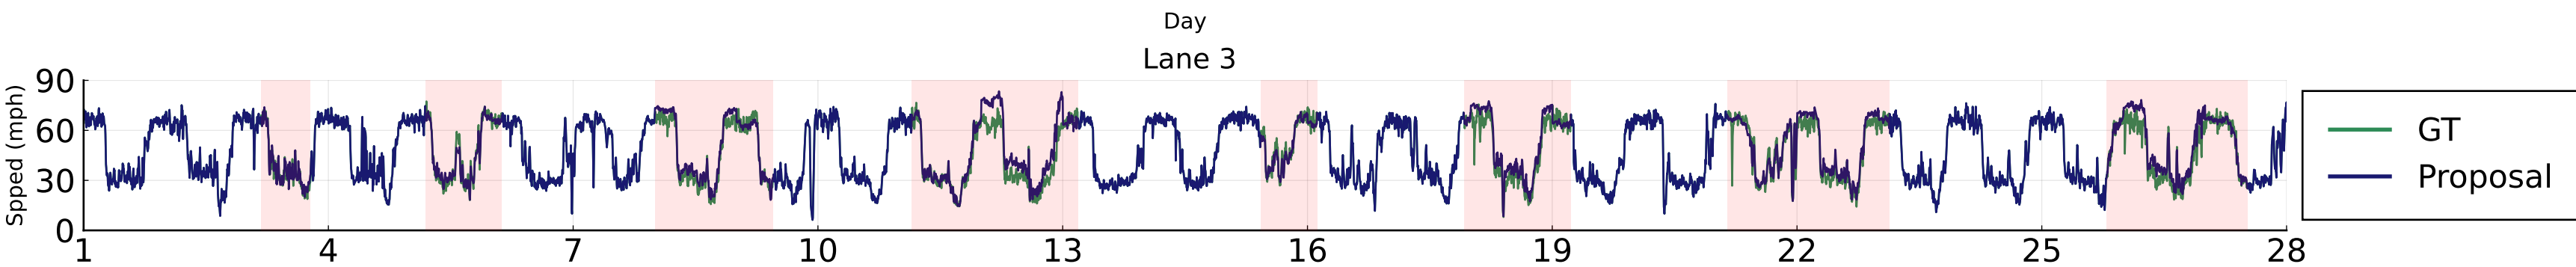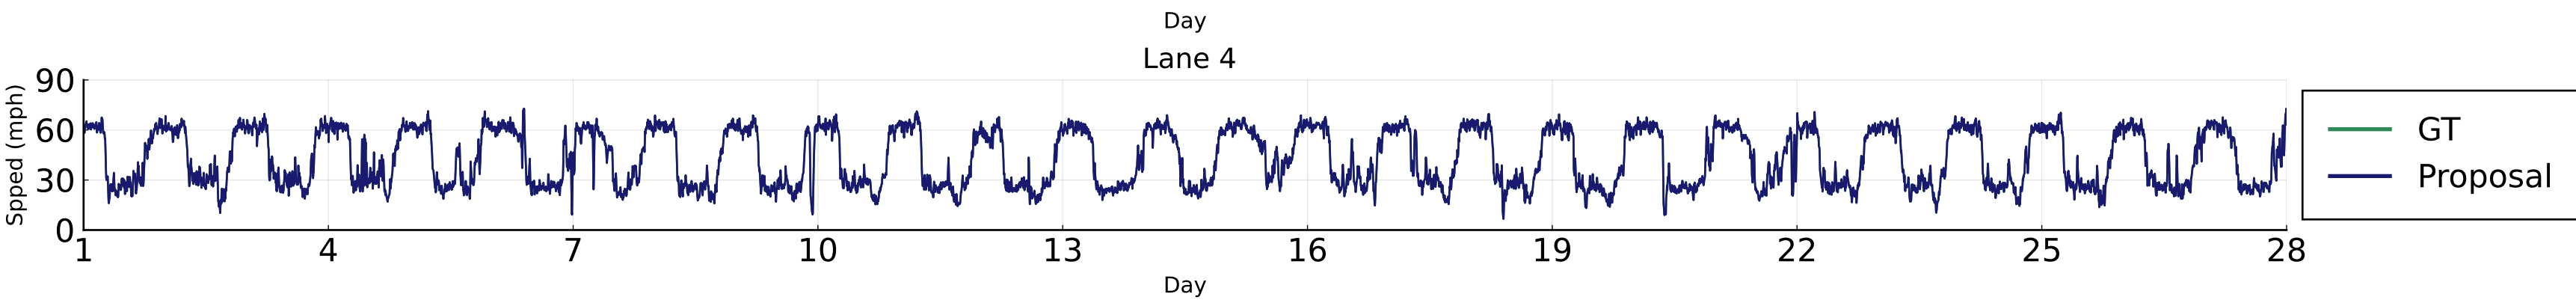

Supplement: supplementary_material [file attachment]

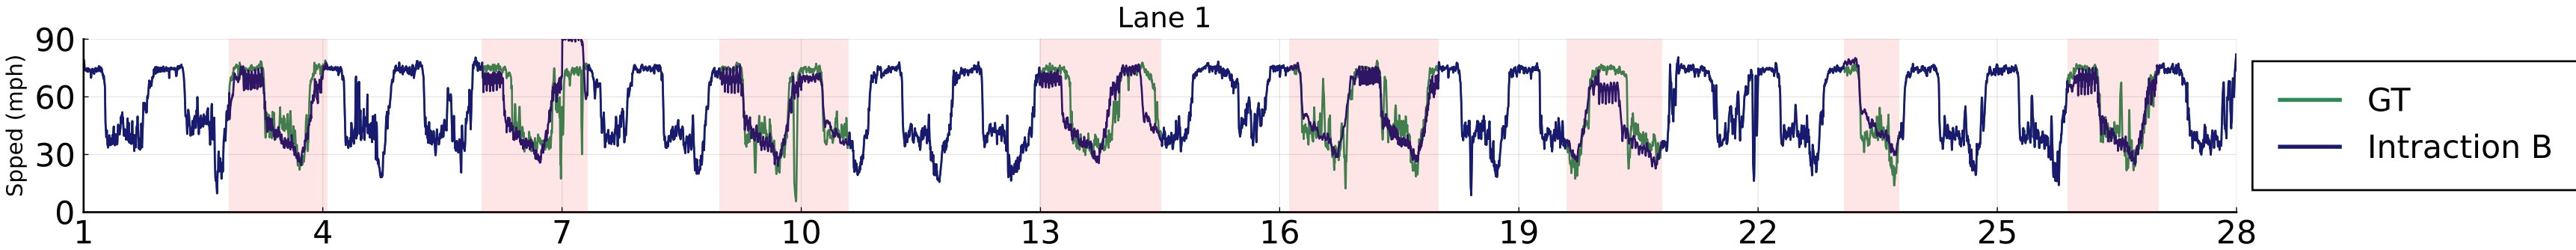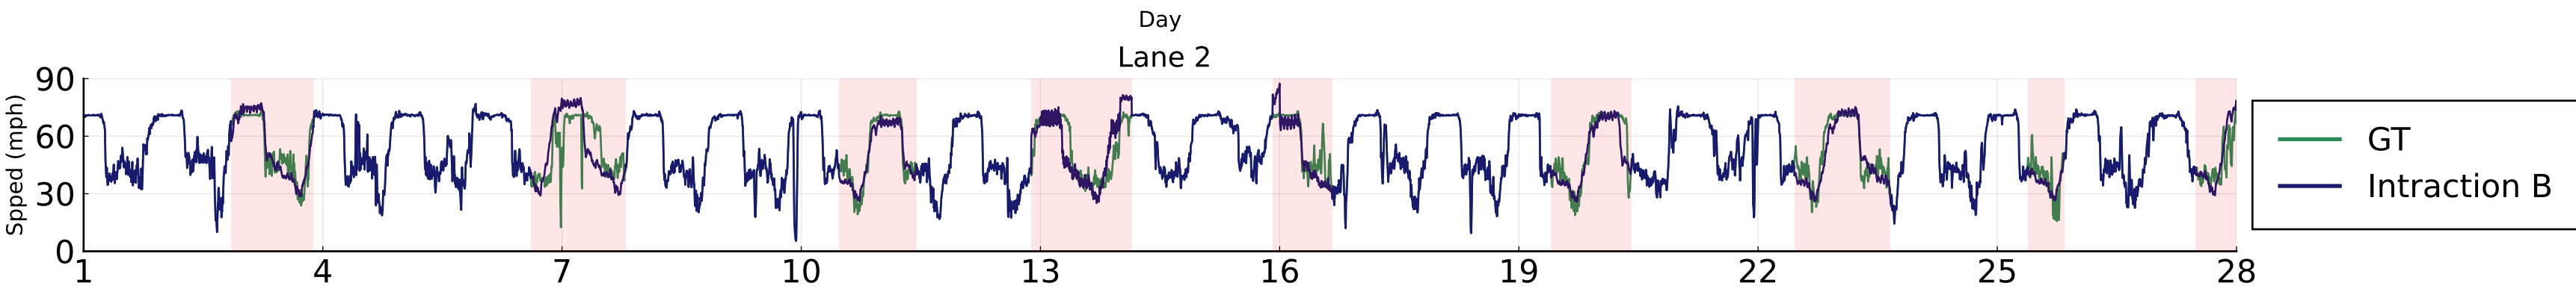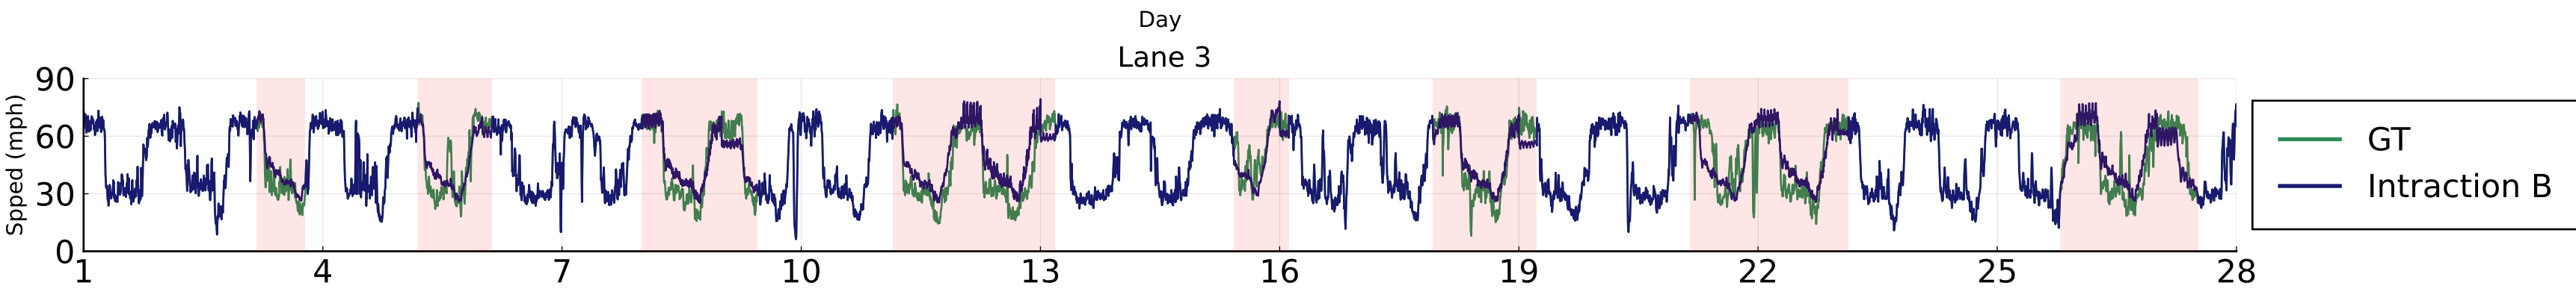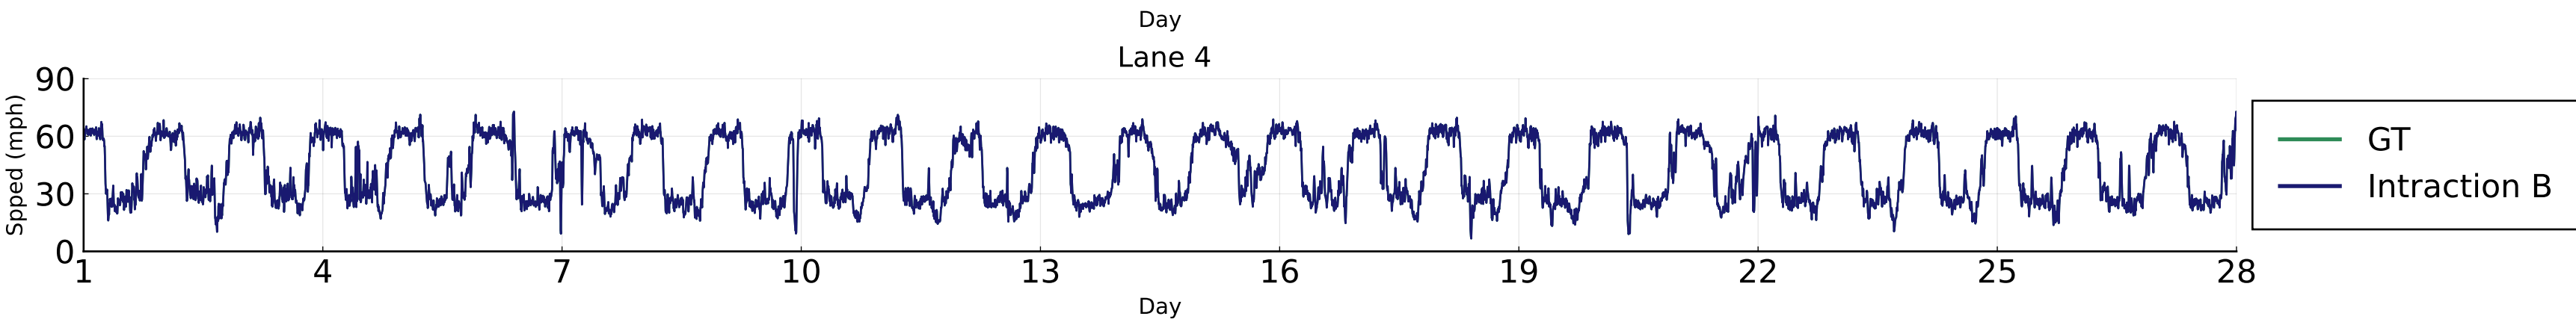

Supplement: supplementary_material [file attachment]

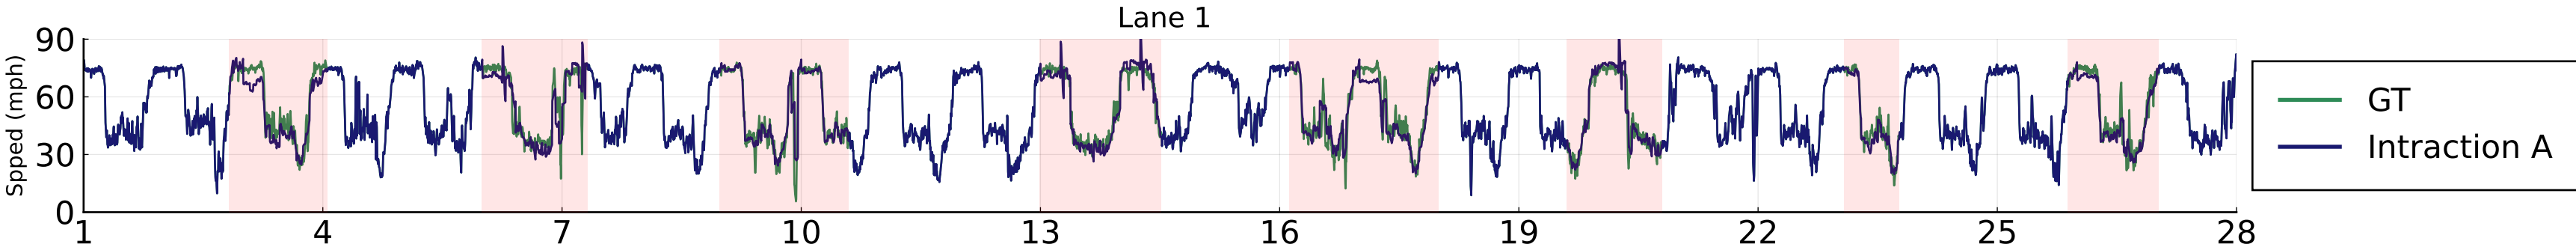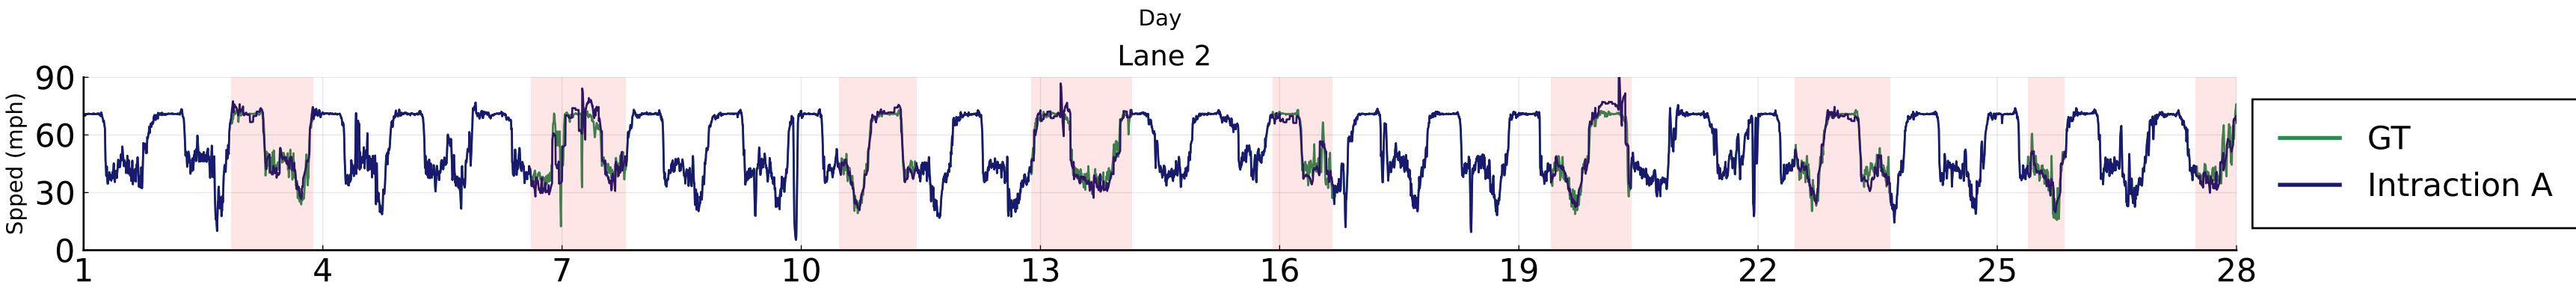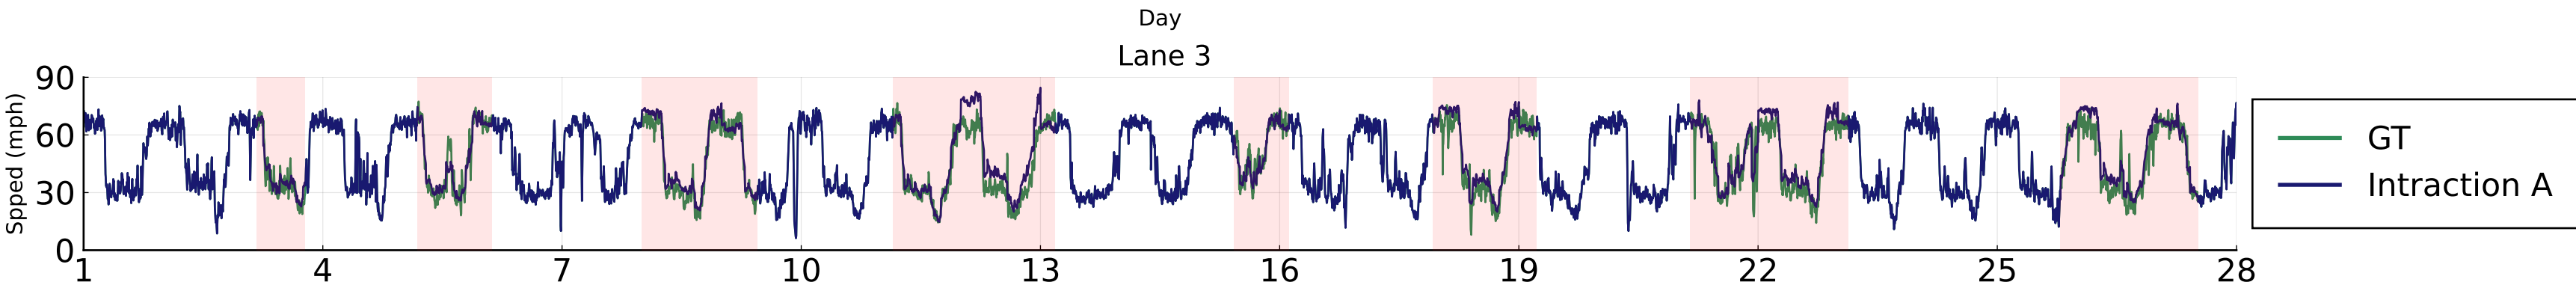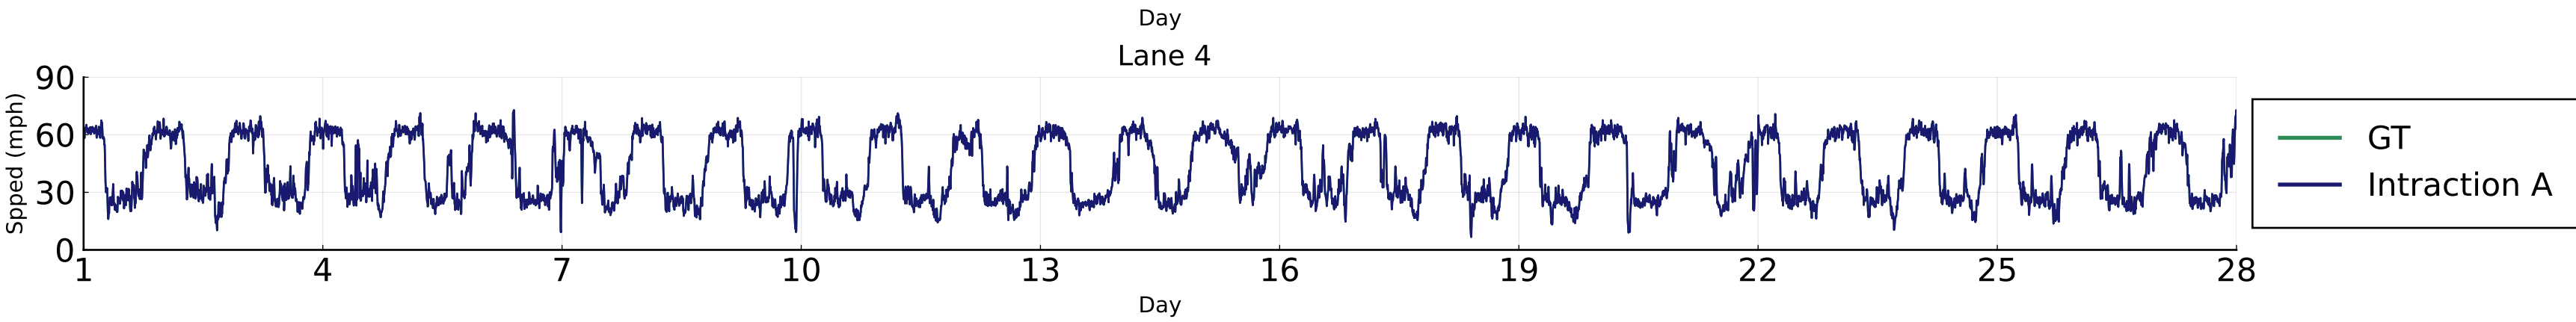

Supplement: supplementary_material [file attachment]

### Scenario 3

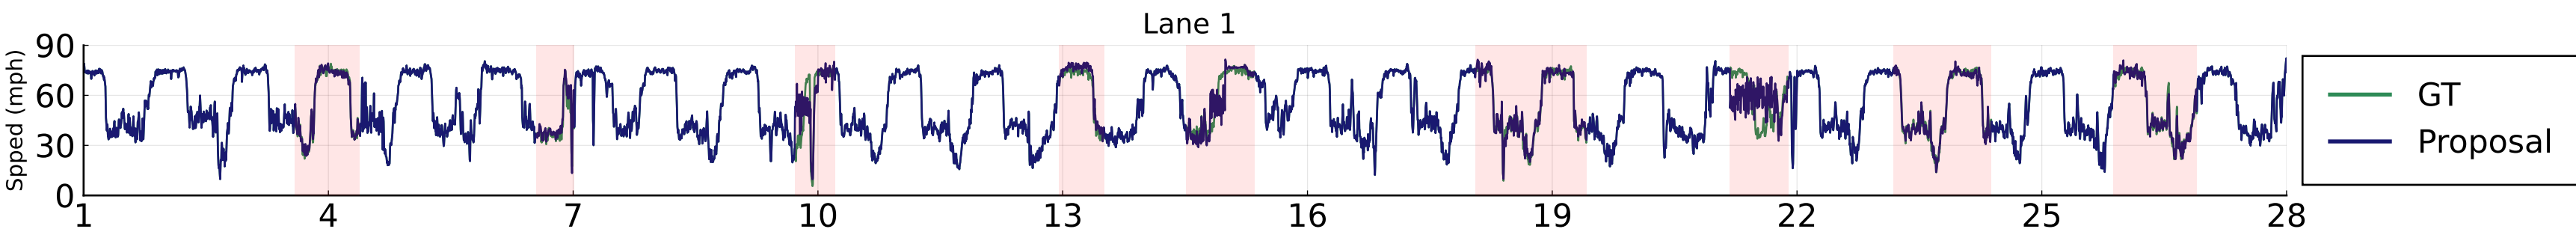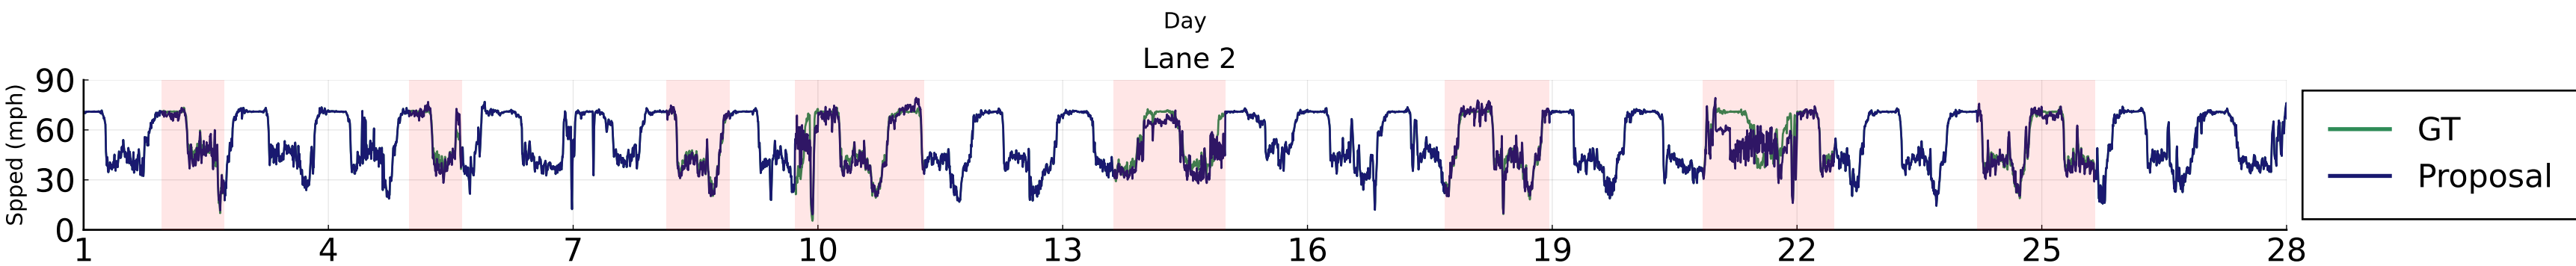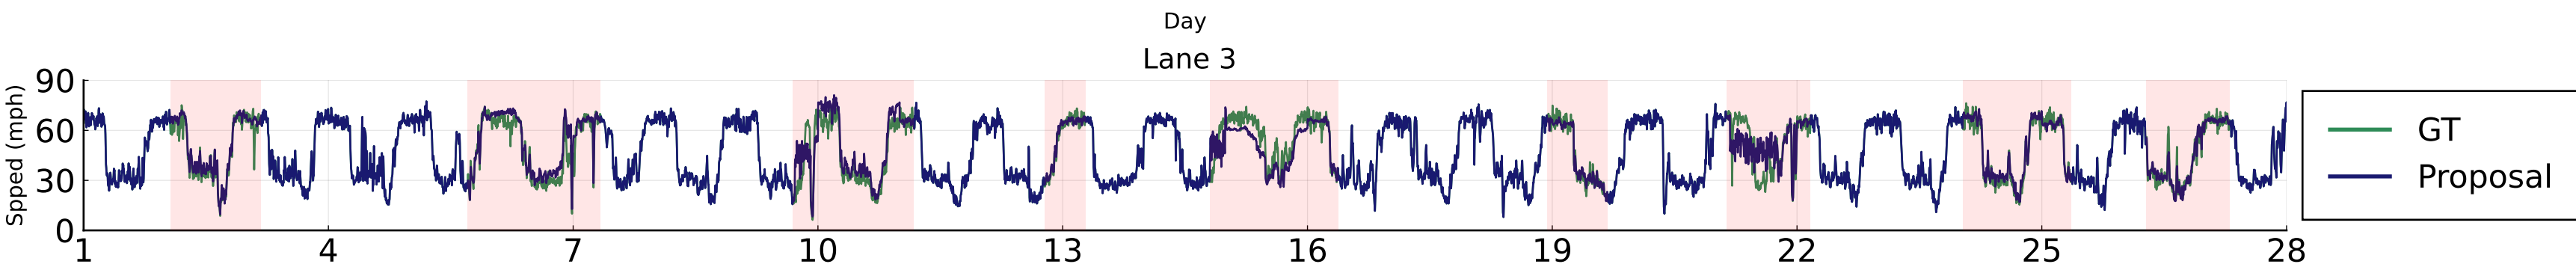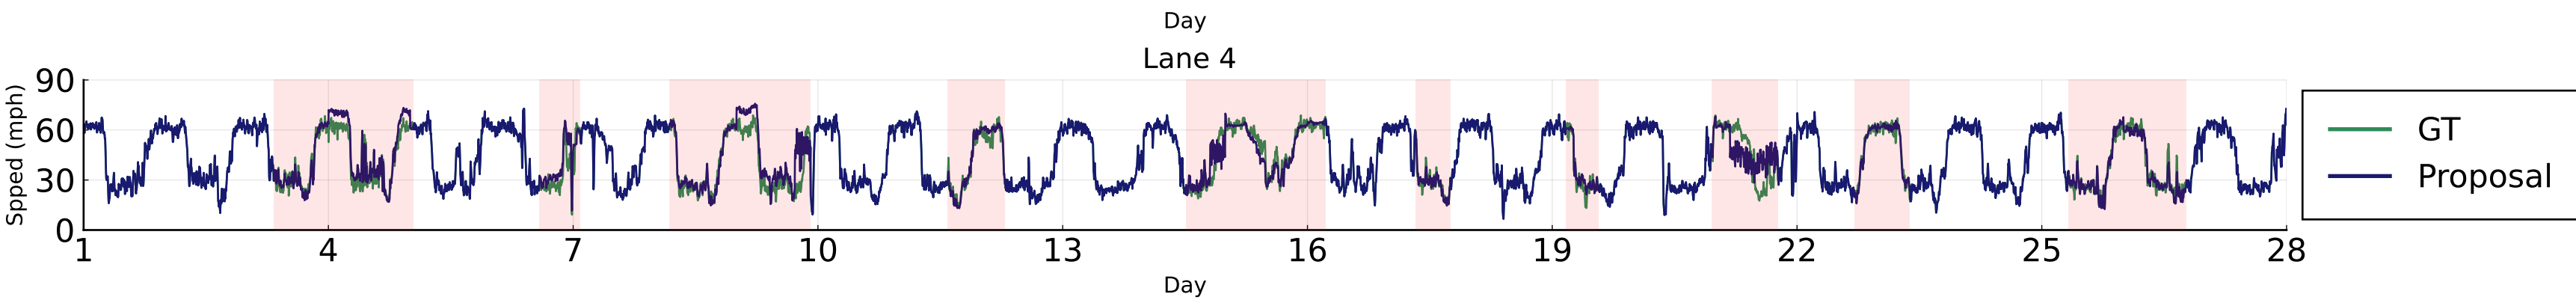

Supplement: supplementary_material [file attachment]

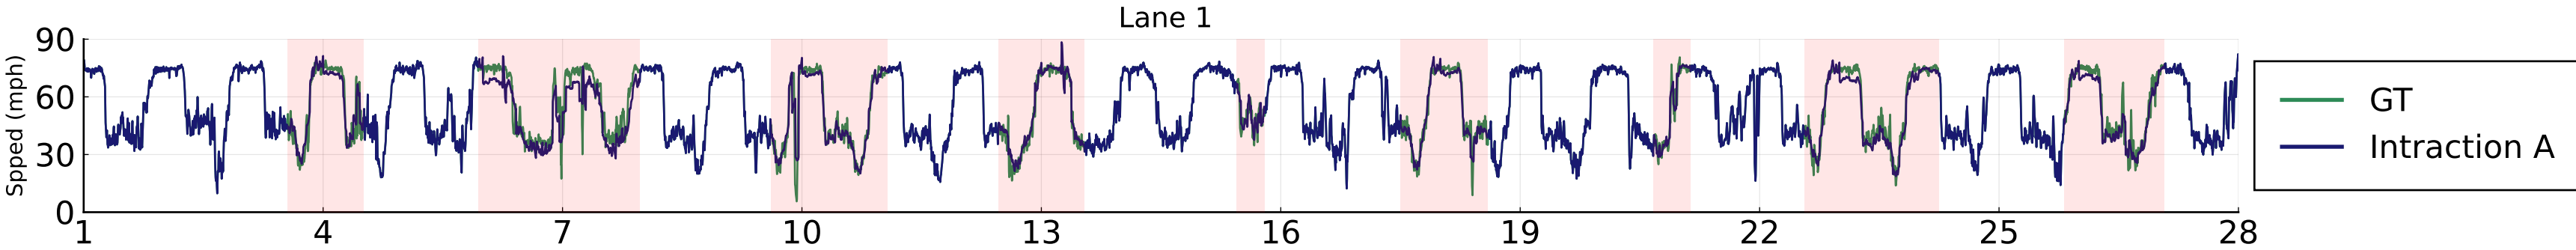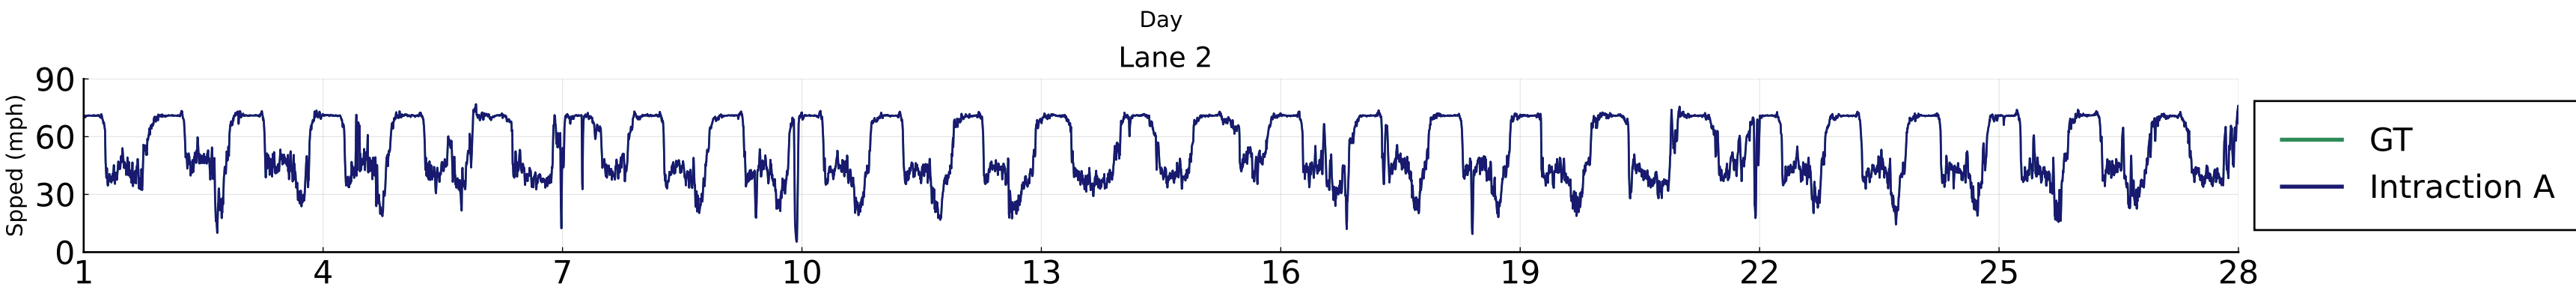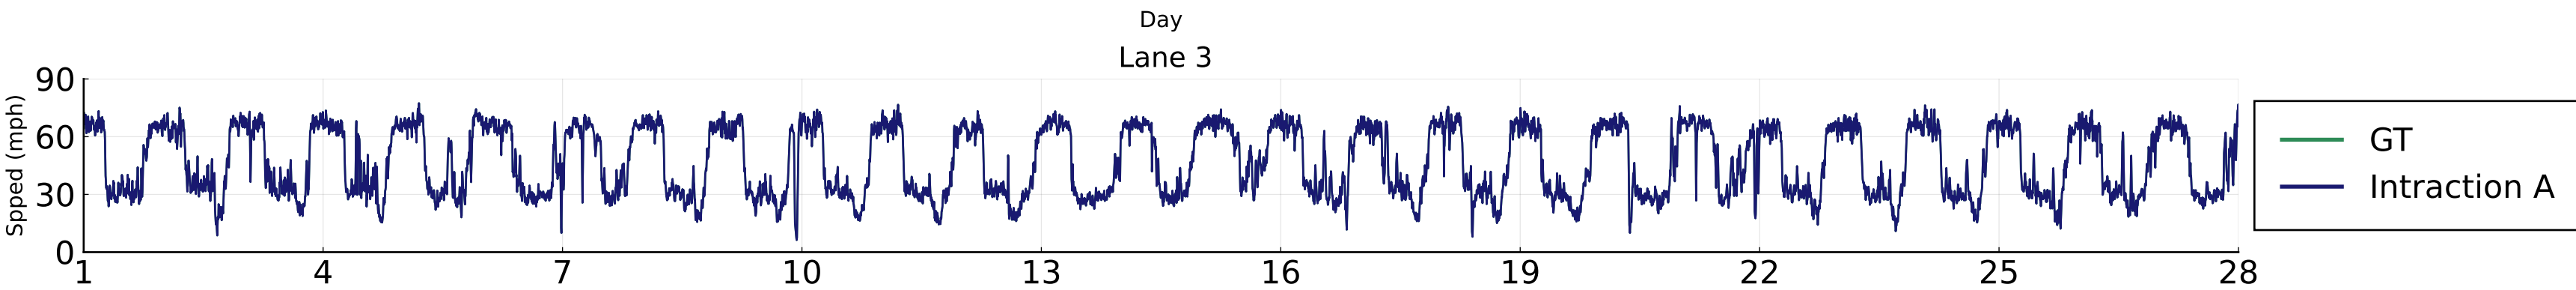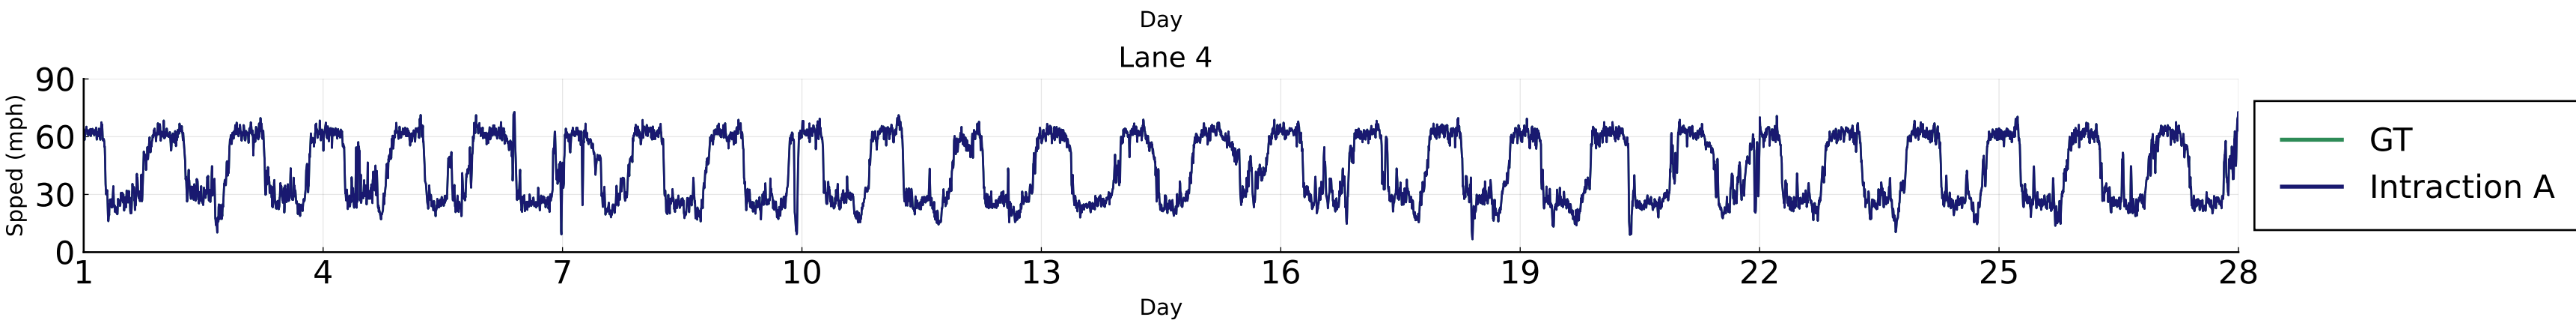

Supplement: supplementary_material [file attachment]

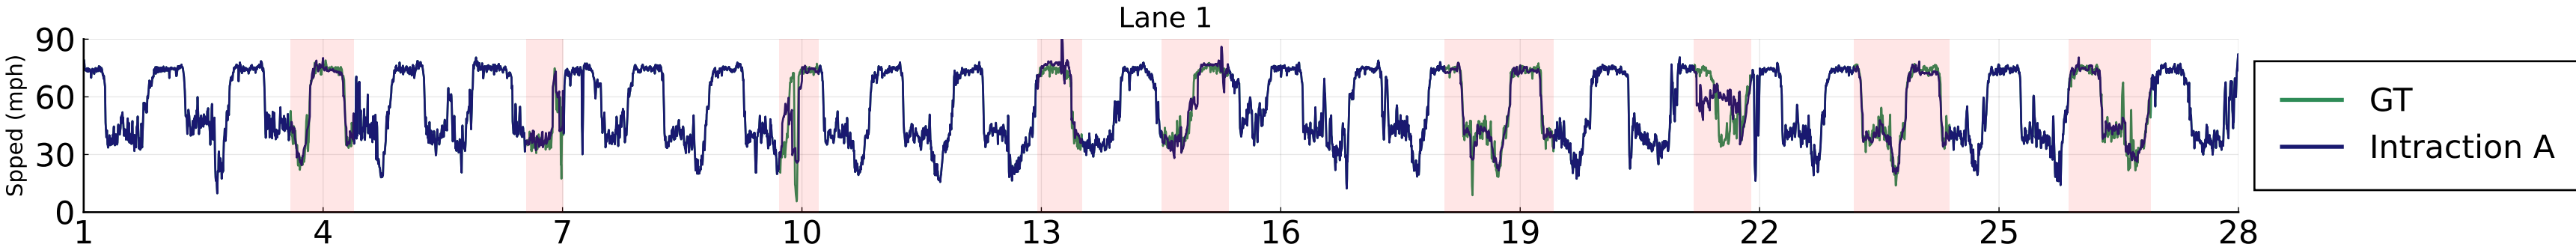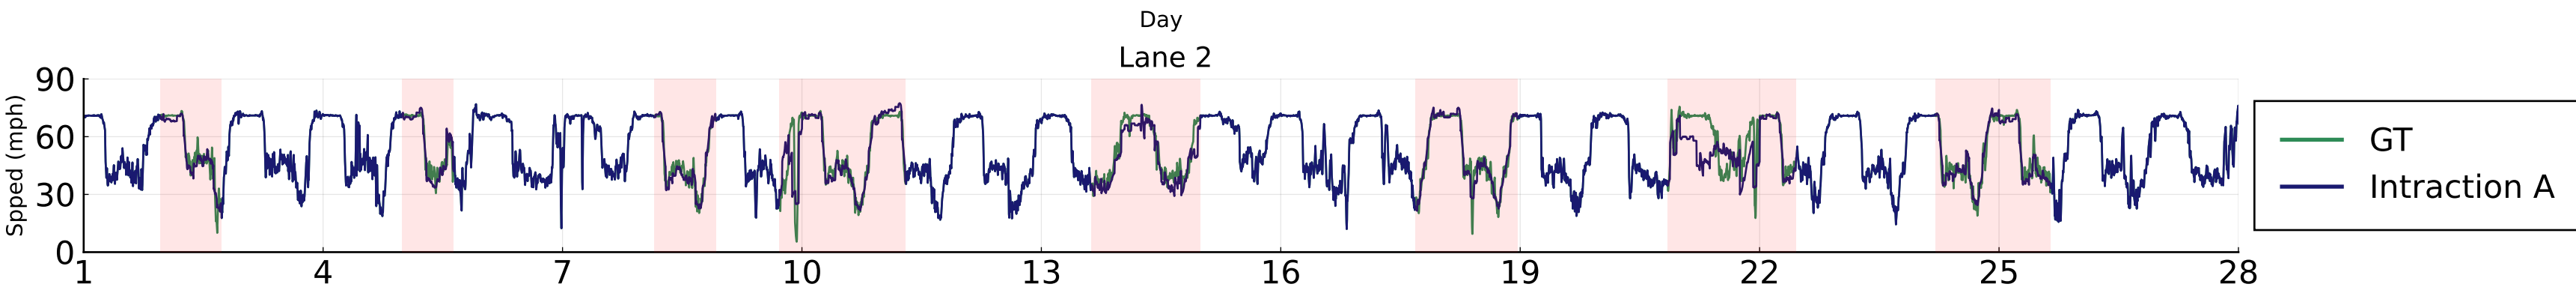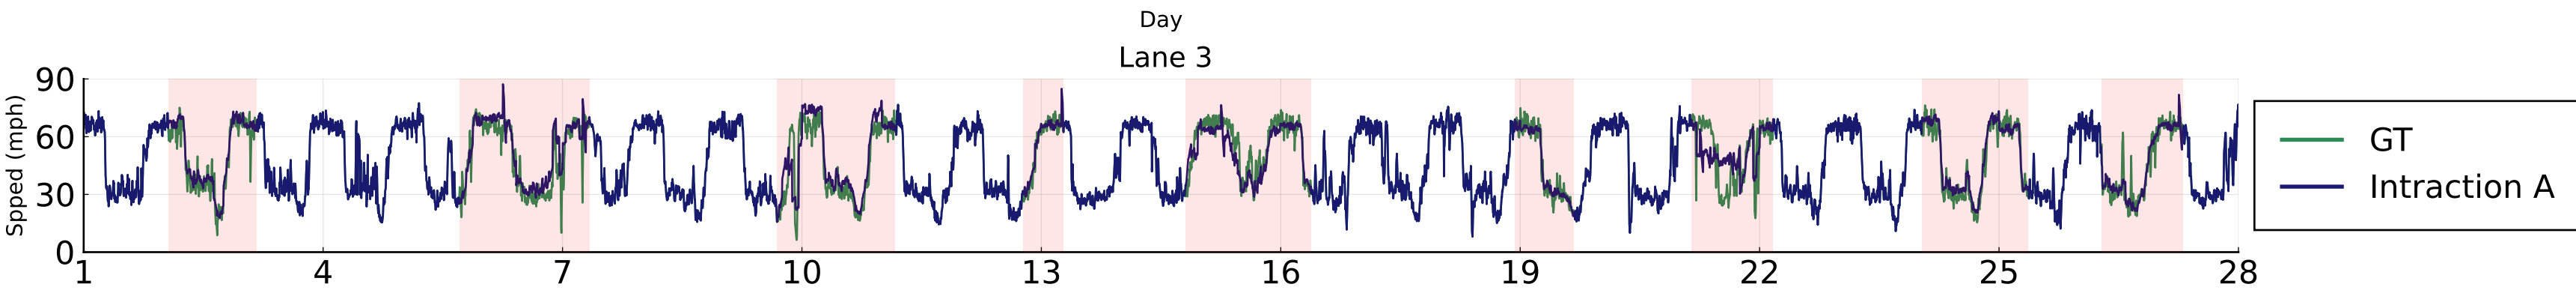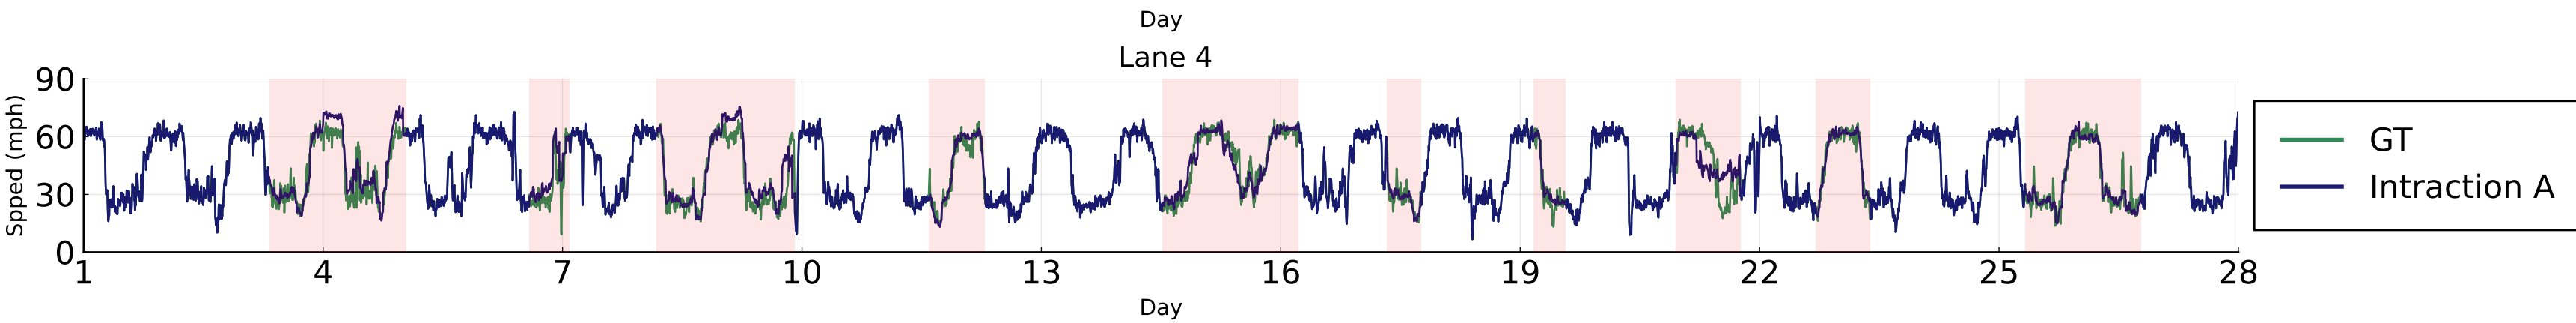

Supplement: supplementary_material [file attachment]

# Scenario 1

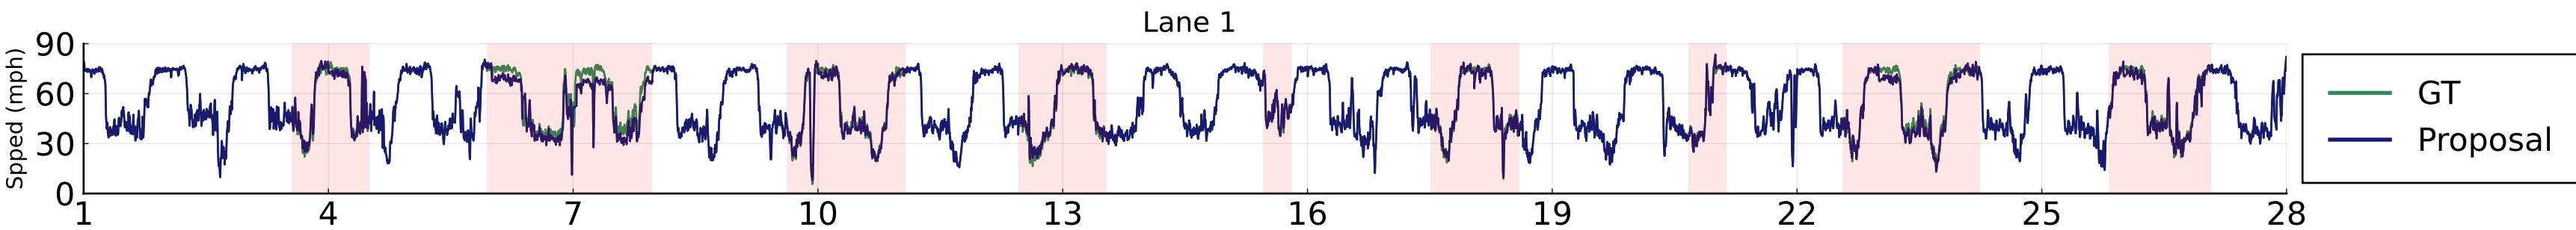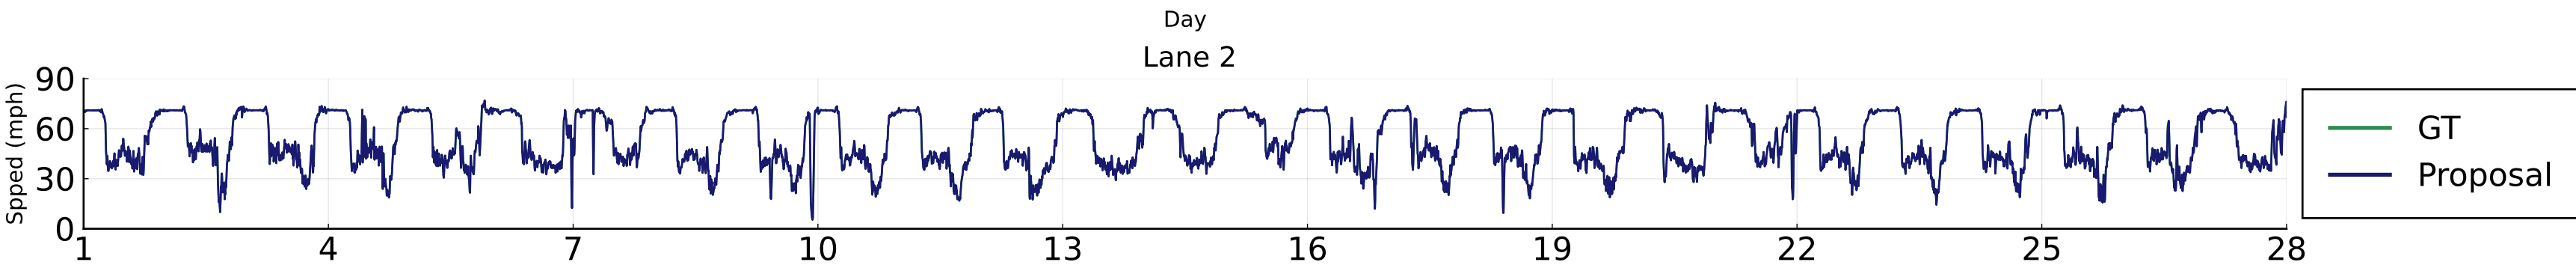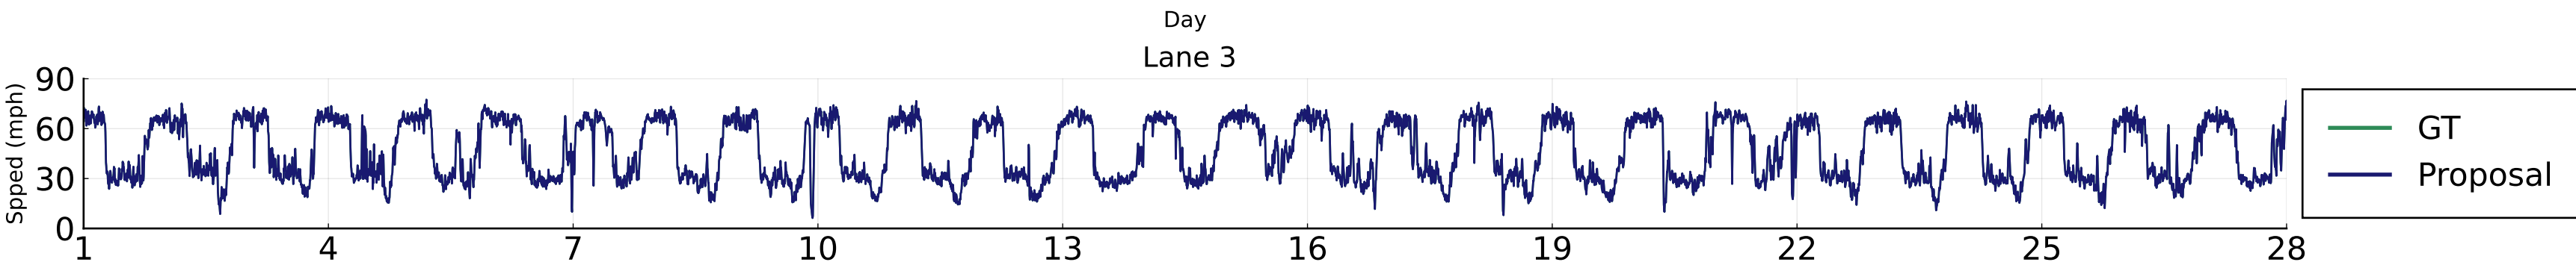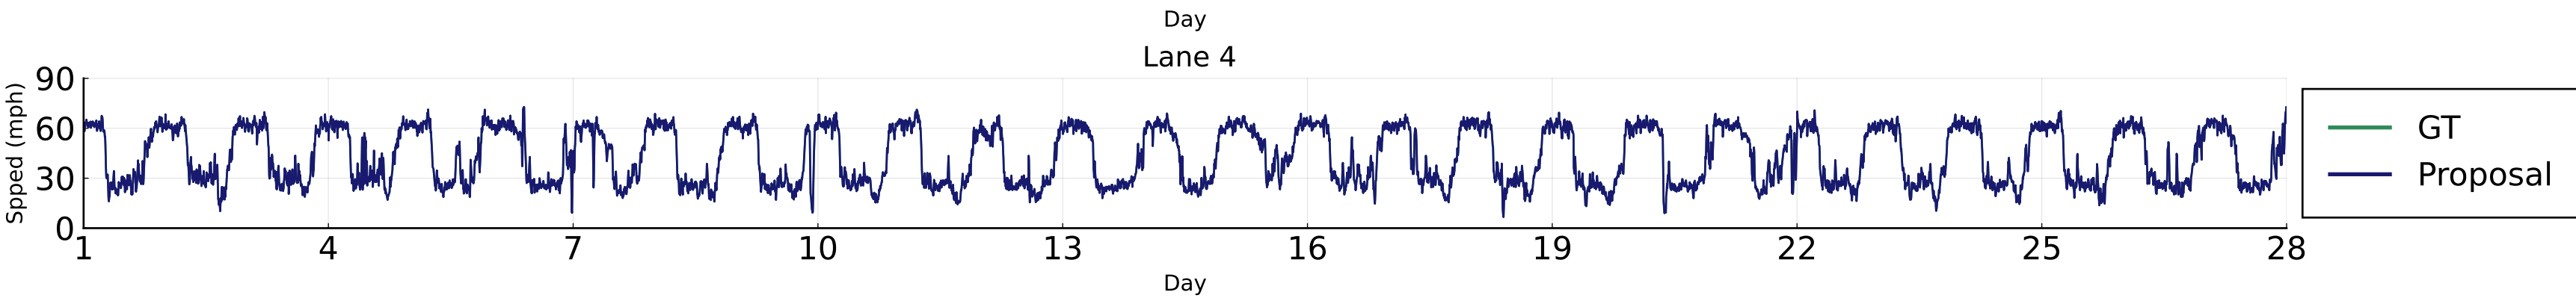

Supplement: supplementary_material [file attachment]
